# Supplementary material
Source: Springer Nature journal article supplement (https://www.springermedizin.de/resource/supplementary/13256_2011_2032_MOESM1_ESM.pdf/9649710)

**A**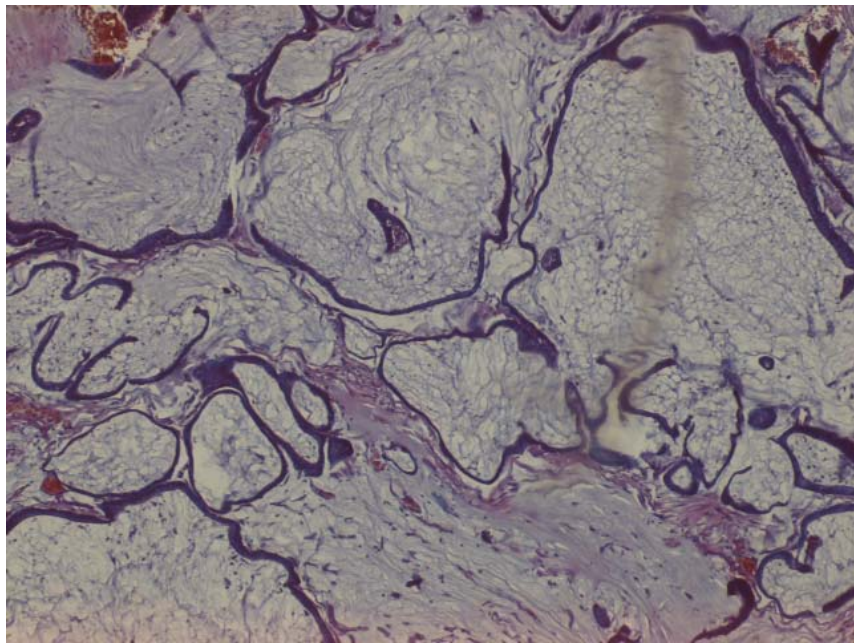**B**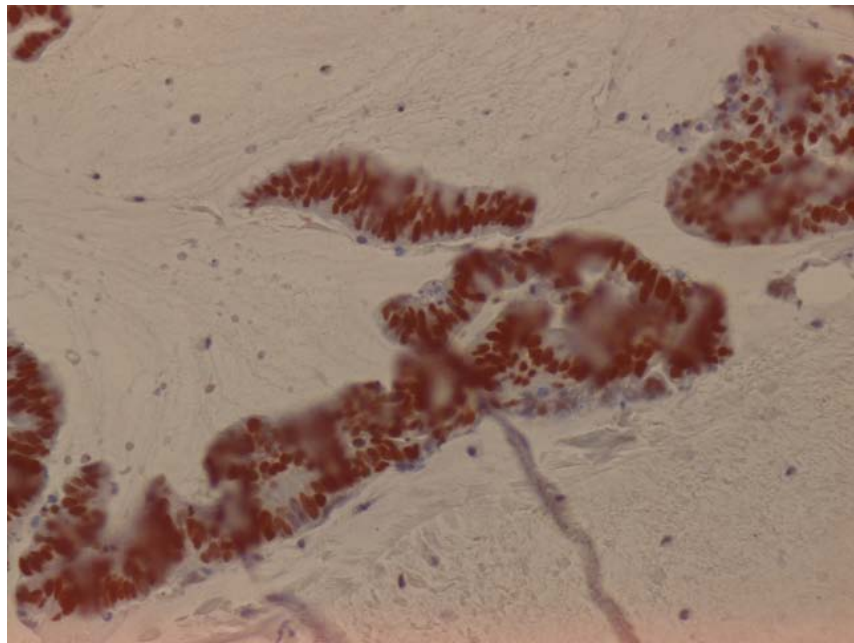

Supplement: MOESM1 [file 9649710]
